# Supplementary material for: Brazilian Multiethnic Association Study of Genetic Variant Interactions among FOS, CASP8, MMP2 and CRISPLD2 in the Risk of Nonsyndromic Cleft Lip with or without Cleft Palate
Source: MDPI journal article supplement (doi:10.3390/dj11010007), 2022-12-26
Supplement: s1 [file dentistry-1971369-supplementary.pdf › dentistry-1971369-supplementary.pdf]

**Table S1.** Association between *FOS* rs1046117 and the risk of nonsyndromic cleft lip with or without cleft palate (NSCL±P), nonsyndromic cleft lip only (NSCLO) and nonsyndromic cleft lip and palate (NSCLP) in patients stratified by genomic ancestry: high European (A) and high African (B). *p* values were adjusted for covariates by logistic regression analysis.

| A. High European Genomic Ancestry |             |             |                                |             |                                |             |                                |
|-----------------------------------|-------------|-------------|--------------------------------|-------------|--------------------------------|-------------|--------------------------------|
|                                   | Control     | NSCL±P      | OR (95% CI)/ <i>p</i><br>value | NSCLO       | OR (95% CI)/ <i>p</i><br>value | NSCLP       | OR (95% CI)/ <i>p</i><br>value |
| Allele                            |             |             |                                |             |                                |             |                                |
| T                                 | 79.4%       | 77.4%       | Reference                      | 75.7%       | Reference                      | 78.1%       | Reference                      |
| C                                 | 20.6%       | 22.6%       | 1.12 (0.93-1.36)/0.23          | 24.3%       | 1.23 (0.93-1.64)/0.15          | 21.9%       | 1.08 (0.87-1.34)/0.48          |
| Genotype                          |             |             |                                |             |                                |             |                                |
| TT                                | 64.0%       | 59.2%       | Reference                      | 55.1%       | Reference                      | 62.0%       | Reference                      |
| TC                                | 30.8%       | 35.4%       | 1.20 (0.93-1.53)/0.15          | 41.3%       | 1.56 (1.09-2.22)/0.01          | 32.2%       | 1.07 (0.82-1.41)/0.60          |
| CC                                | 5.2%        | 5.4%        | 1.08 (0.63-1.83)/0.70          | 3.6%        | 0.81 (0.33-1.99)/0.66          | 5.8%        | 1.15 (0.66-2.01)/0.59          |
| Dominant (TT/TC + CC)             | 64.0%/36.0% | 59.2%/40.8% | 1.18 (0.93-1.50)/0.17          | 55.1%/44.9% | 1.45 (1.03-2.05)/0.03          | 62.0%/38.0% | 1.08 (0.84-1.40)/0.54          |
| Recessive (TT + TC/CC)            | 94.8%/5.2%  | 94.6%/5.4%  | 1.01 (0.60-1.70)/0.96          | 96.4%/3.6%  | 0.69 (0.28-1.68)/0.39          | 94.2%/5.8%  | 1.13 (0.65-1.95)/0.66          |
| B. High African Genomic Ancestry  |             |             |                                |             |                                |             |                                |
|                                   | Control     | NSCL±P      | OR (95% CI)/ <i>p</i><br>value | NSCLO       | OR (95% CI)/ <i>p</i><br>value | NSCLP       | OR (95% CI)/ <i>p</i><br>value |
| Allele                            |             |             |                                |             |                                |             |                                |
| T                                 | 83.3%       | 77.7%       | Reference                      | 77.4%       | Reference                      | 77.8%       | Reference                      |
| C                                 | 16.7%       | 22.3%       | 1.43 (1.01-2.03)/0.04          | 22.6%       | 1.42 (0.84-2.38)/0.18          | 22.2%       | 1.42 (0.97-2.08)/0.07          |
| Genotype                          |             |             |                                |             |                                |             |                                |
| TT                                | 71.5%       | 64.3%       | Reference                      | 60.4%       | Reference                      | 63.7%       | Reference                      |
| TC                                | 23.5%       | 29.0%       | 1.44 (0.94-2.21)/0.08          | 34.0%       | 1.81 (0.93-3.52)/0.08          | 28.1%       | 1.39 (0.84-2.30)/0.18          |
| CC                                | 5.0%        | 6.7%        | 1.47 (0.67-3.24)/0.34          | 5.7%        | 1.45 (0.38-5.55)/0.57          | 8.1%        | 1.86 (0.77-4.49)/0.20          |
| Dominant (TT/TC + CC)             | 71.5%/28.5% | 64.3%/35.7% | 1.45 (0.97-2.15)/0.06          | 60.4%/39.7% | 1.74 (0.93-3.28)/0.08          | 63.7%/36.2% | 1.48 (0.93-2.35)/0.09          |
| Recessive (TT + TC/CC)            | 95.0%/5.0%  | 93.3%/6.7%  | 1.33 (0.61-2.89)/0.47          | 94.4%/5.7%  | 1.21 (0.32-4.54)/0.78          | 91.8%/8.1%  | 1.69 (0.71-4.03)/0.23          |

**Table S2.** Association between *CASP8* rs3769825 and the risk of nonsyndromic cleft lip with or without cleft palate (NSCL±P), nonsyndromic cleft lip only (NSCLO) and nonsyndromic cleft lip and palate (NSCLP) in patients stratified by genomic ancestry: high European (A) and high African (B). *p* values were adjusted for covariates by logistic regression analysis.

| A. High European Genomic Ancestry |         |        |                                |       |                                |       |                                |
|-----------------------------------|---------|--------|--------------------------------|-------|--------------------------------|-------|--------------------------------|
|                                   | Control | NSCL±P | OR (95% CI)/ <i>p</i><br>value | NSCLO | OR (95% CI)/ <i>p</i><br>value | NSCLP | OR (95% CI)/ <i>p</i><br>value |
| Allele                            |         |        |                                |       |                                |       |                                |

|                        |             |             |                       |             |                       |             |                       |
|------------------------|-------------|-------------|-----------------------|-------------|-----------------------|-------------|-----------------------|
| A                      | 52.5%       | 56.7%       | Reference             | 57.9%       | Reference             | 56.3%       | Reference             |
| G                      | 47.5%       | 43.3%       | 0.84 (0.72-0.99)/0.04 | 42.1%       | 0.80 (0.63-1.03)/0.08 | 43.7%       | 0.86 (0.72-1.03)/0.09 |
| Genotype               |             |             |                       |             |                       |             |                       |
| AA                     | 27.1%       | 31.1%       | Reference             | 33.9%       | Reference             | 31.0%       | Reference             |
| AG                     | 50.9%       | 50.5%       | 0.85 (0.65-1.11)/0.24 | 47.9%       | 0.75 (0.51-1.10)/0.14 | 50.6%       | 0.88 (0.66-1.17)/0.37 |
| GG                     | 22.0%       | 18.4%       | 0.69 (0.49-0.96)/0.02 | 18.2%       | 0.66 (0.40-1.08)/0.10 | 18.4%       | 0.74 (0.51-1.06)/0.10 |
| Dominant (AA/AG + GG)  | 27.1%/72.9% | 31.1%/68.9% | 0.80 (0.62-1.03)/0.08 | 33.9%/66.1% | 0.72 (0.50-1.04)/0.08 | 31.0%/69.0% | 0.84 (0.64-1.10)/0.19 |
| Recessive (AA + AG/GG) | 78.0%/22.0% | 81.6%/18.4% | 0.76 (0.57-1.02)/0.06 | 81.8%/18.2% | 0.79 (0.51-1.22)/0.27 | 81.6%/18.4% | 0.80 (0.59-1.10)/0.16 |

#### B. High African Genomic Ancestry

|                        | Control     | NSCL±P      | OR (95% CI)/p value   | NSCLO       | OR (95% CI)/p value   | NSCLP       | OR (95% CI)/p value   |
|------------------------|-------------|-------------|-----------------------|-------------|-----------------------|-------------|-----------------------|
| Allele                 |             |             |                       |             |                       |             |                       |
| A                      | 58.1%       | 57.0%       | Reference             | 60.0%       | Reference             | 55.8%       | Reference             |
| G                      | 41.9%       | 43.0%       | 1.05 (0.79-1.37)/0.74 | 40.0%       | 0.93 (0.61-1.40)/0.71 | 44.2%       | 1.10 (0.81-1.48)/0.53 |
| Genotype               |             |             |                       |             |                       |             |                       |
| AA                     | 32.6%       | 32.3%       | Reference             | 36.7%       | Reference             | 28.1%       | Reference             |
| AG                     | 51.1%       | 51.1%       | 1.01 (0.68-1.52)/0.98 | 46.7%       | 0.78 (0.41-1.47)/0.43 | 55.5%       | 1.29 (0.79-2.08)/0.36 |
| GG                     | 16.3%       | 16.6%       | 1.11 (0.64-1.92)/0.66 | 16.7%       | 0.84 (0.36-1.98)/0.69 | 16.4%       | 1.16 (0.60-2.21)/0.64 |
| Dominant (AA/AG + GG)  | 32.6%/67.4% | 32.3%/67.7% | 1.03 (0.70-1.52)/0.86 | 36.7%/63.4% | 0.79 (0.44-1.45)/0.45 | 28.1%/71.9% | 1.25 (0.79-1.99)/0.33 |
| Recessive (AA + AG/GG) | 83.7%/16.3% | 83.4%/16.6% | 1.10 (0.67-1.80)/0.70 | 83.4%/16.7% | 0.98 (0.45-2.12)/0.95 | 83.6%/16.4% | 0.99 (0.56-1.74)/0.96 |

**Table S3.** Association between *MMP2* rs243836 and the risk of nonsyndromic cleft lip with or without cleft palate (NSCL±P), nonsyndromic cleft lip only (NSCLO) and nonsyndromic cleft lip and palate (NSCLP) in patients stratified by genomic ancestry: high European (A) and high African (B). *p* values were adjusted for covariates by logistic regression analysis.

| A. High European Genomic Ancestry |             |             |                       |             |                       |             |                       |
|-----------------------------------|-------------|-------------|-----------------------|-------------|-----------------------|-------------|-----------------------|
|                                   | Control     | NSCL±P      | OR (95% CI)/p value   | NSCLO       | OR (95% CI)/p value   | NSCLP       | OR (95% CI)/p value   |
| Allele                            |             |             |                       |             |                       |             |                       |
| G                                 | 53.5%       | 52.1%       | Reference             | 53.6%       | Reference             | 51.5%       | Reference             |
| A                                 | 46.5%       | 47.9%       | 1.06 (0.90-1.24)/0.49 | 46.4%       | 0.99 (0.78-1.27)/0.97 | 48.5%       | 1.08 (0.91-1.29)/0.37 |
| Genotype                          |             |             |                       |             |                       |             |                       |
| GG                                | 28.2%       | 28.0%       | Reference             | 29.2%       | Reference             | 26.8%       | Reference             |
| GA                                | 50.5%       | 48.7%       | 1.00 (0.76-1.31)/0.99 | 48.8%       | 0.93 (0.62-1.39)/0.71 | 49.4%       | 1.03 (0.77-1.39)/0.80 |
| AA                                | 21.3%       | 23.3%       | 1.14 (0.83-1.58)/0.39 | 23.0%       | 1.01 (0.62-1.63)/0.90 | 23.8%       | 1.17 (0.82-1.66)/0.35 |
| Dominant (GG/GA + AA)             | 28.2%/71.8% | 28.0%/72.0% | 1.04 (0.81-1.35)/0.74 | 29.2%/71.8% | 0.95 (0.66-1.39)/0.80 | 26.8%/73.2% | 1.07 (0.81-1.42)/0.61 |
| Recessive (GG + GA/AA)            | 78.7%/21.3% | 76.7%/23.3% | 1.14 (0.87-1.51)/0.34 | 78.0%/23.0% | 1.06 (0.70-1.60)/0.79 | 76.2%/23.8% | 1.14 (0.85-1.54)/0.37 |
| B. High African Genomic Ancestry  |             |             |                       |             |                       |             |                       |
| .                                 | Control     | NSCL±P      | OR (95% CI)/p value   | NSCLO       | OR (95% CI)/p value   | NSCLP       | OR (95% CI)/p value   |
| Allele                            |             |             |                       |             |                       |             |                       |
| G                                 | 53.8%       | 53.6%       | Reference             | 54.0%       | Reference             | 53.4%       | Reference             |
| A                                 | 46.2%       | 46.4%       | 1.01 (0.77-1.32)/0.94 | 46.0%       | 0.99 (0.66-1.48)/0.97 | 46.6%       | 1.02 (0.75-1.37)/0.91 |
| Genotype                          |             |             |                       |             |                       |             |                       |
| GG                                | 29.0%       | 28.1%       | Reference             | 30.6%       | Reference             | 29.3%       | Reference             |
| GA                                | 49.8%       | 49.4%       | 0.98 (0.64-1.50)/0.87 | 46.8%       | 0.91 (0.47-1.76)/0.78 | 48.3%       | 0.95 (0.58-1.55)/0.75 |
| AA                                | 21.3%       | 22.5%       | 1.05 (0.63-1.76)/0.80 | 22.6%       | 1.04 (0.47-2.31)/0.92 | 22.4%       | 1.06 (0.59-1.91)/0.85 |
| Dominant (GG/GA + AA)             | 29.0%/71.1% | 28.1%/71.9% | 1.00 (0.67-1.49)/0.99 | 30.6%/69.4% | 0.95 (0.51-1.76)/0.87 | 29.3%/70.7% | 0.98 (0.62-1.56)/0.94 |
| Recessive (GG + GA/AA)            | 78.8%/21.3% | 77.5%/22.5% | 1.07 (0.69-1.64)/0.77 | 77.4%/22.6% | 1.11 (0.56-2.19)/0.77 | 77.6%/22.4% | 1.09 (0.66-1.81)/0.73 |
